# Supplementary material
Source: PubMed Central journal article supplement (PMC10347419)

**Figure 2B**

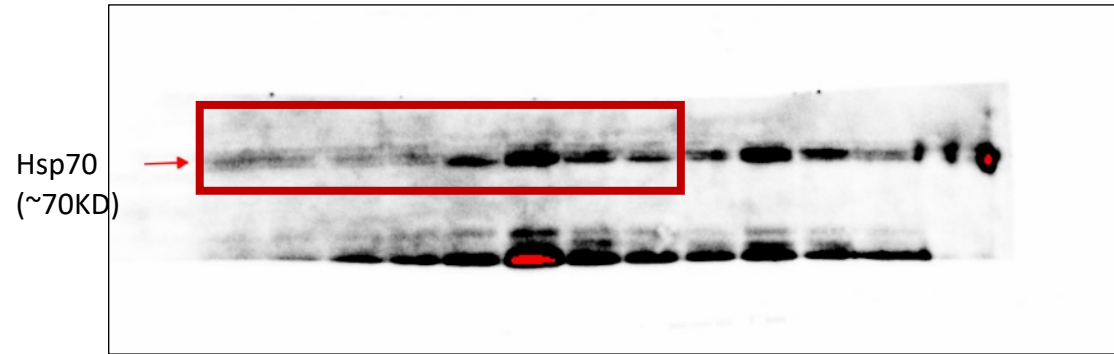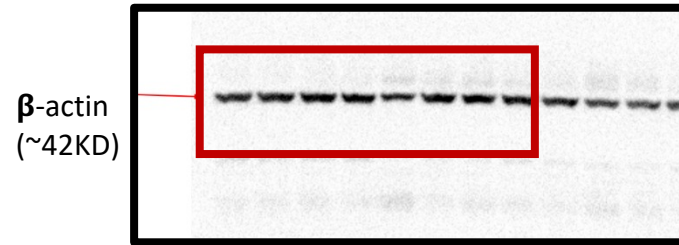

**Figure 2C**

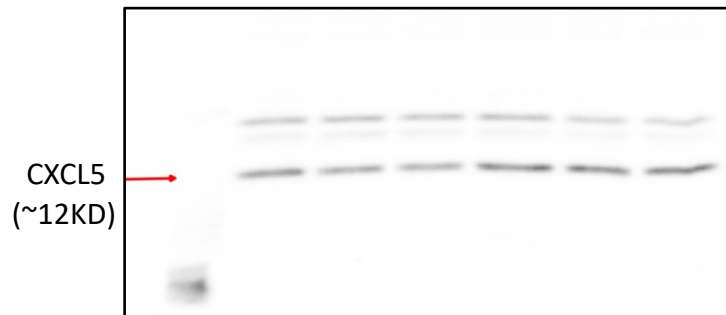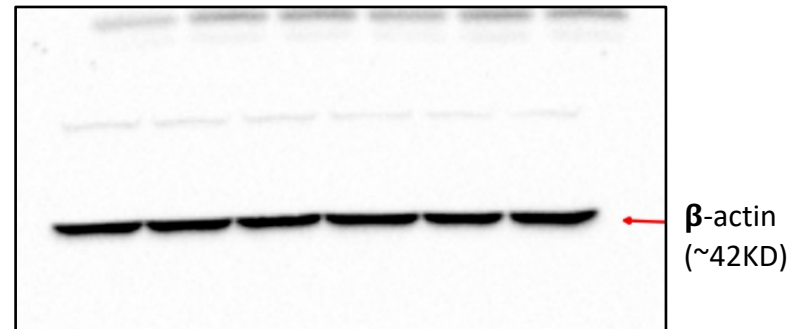

**Figure 2D**

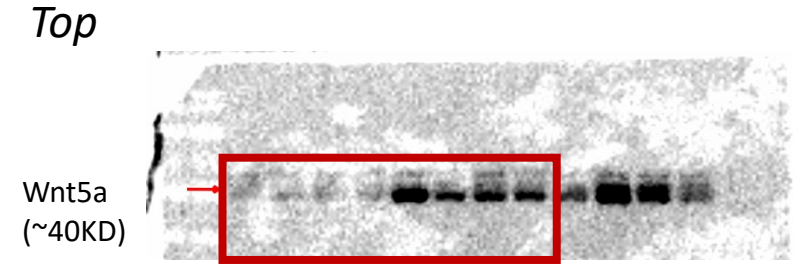

*Bottom*

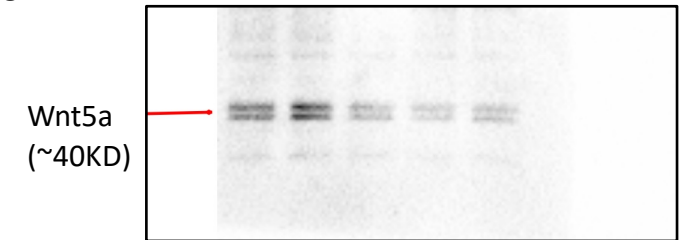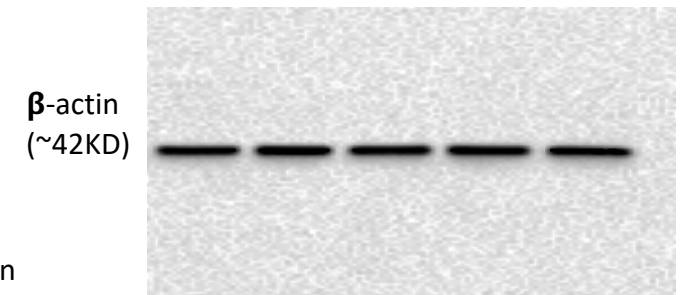

**Figure 7I**

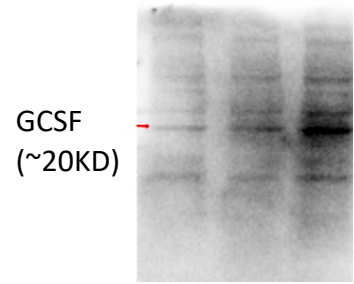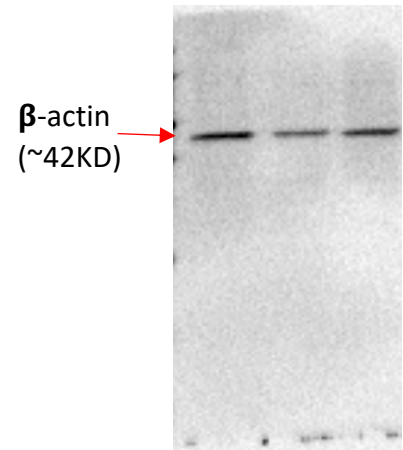

**Figure S4B**

*Lysate*

$\beta$ -actin  
(~42KD)

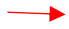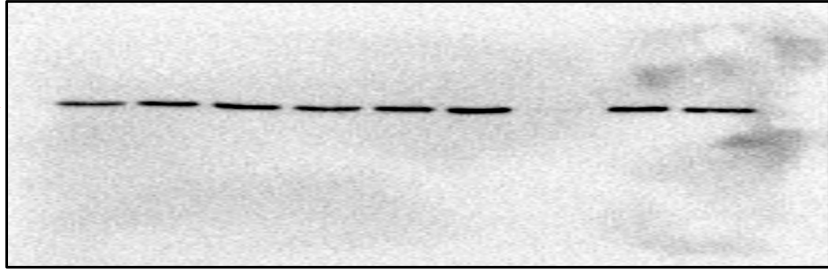

Cleaved IL-1 $\beta$   
(~17KD)

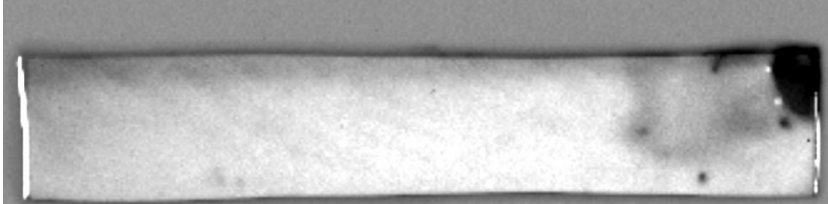

*Supernatant*

Cleaved IL-1 $\beta$   
(~17KD)

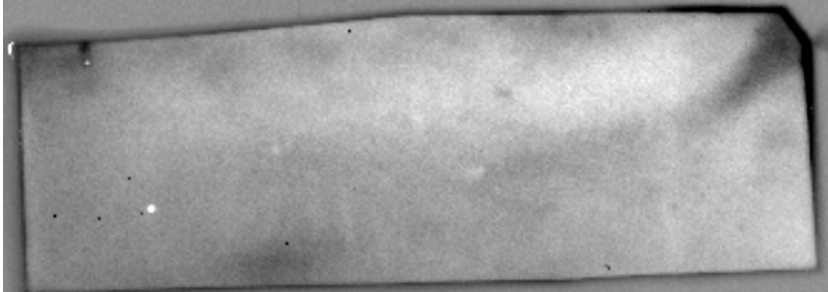

*Supernatant*

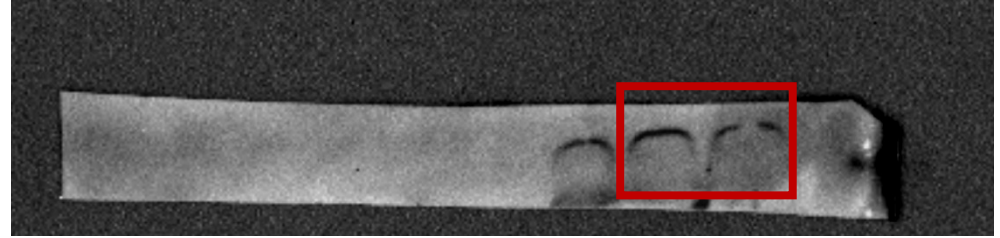

Hsp70  
(~70KD)

**Figure S6**

*Lysate*

Wnt5a  
(~40KD)

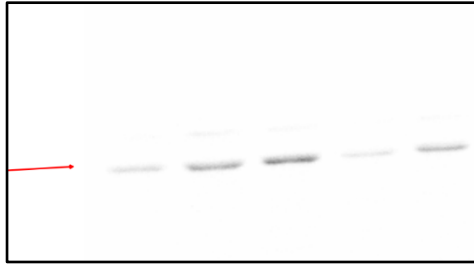

$\beta$ -actin  
(~42KD)

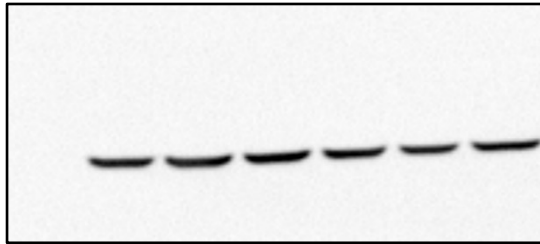

*Supernatant*

Hsp70  
(~70KD)

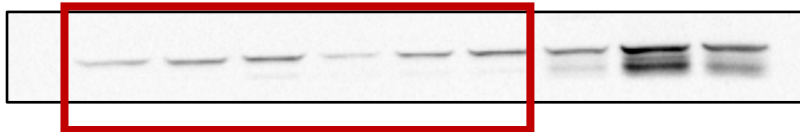

**Figure S7A**

*Top*

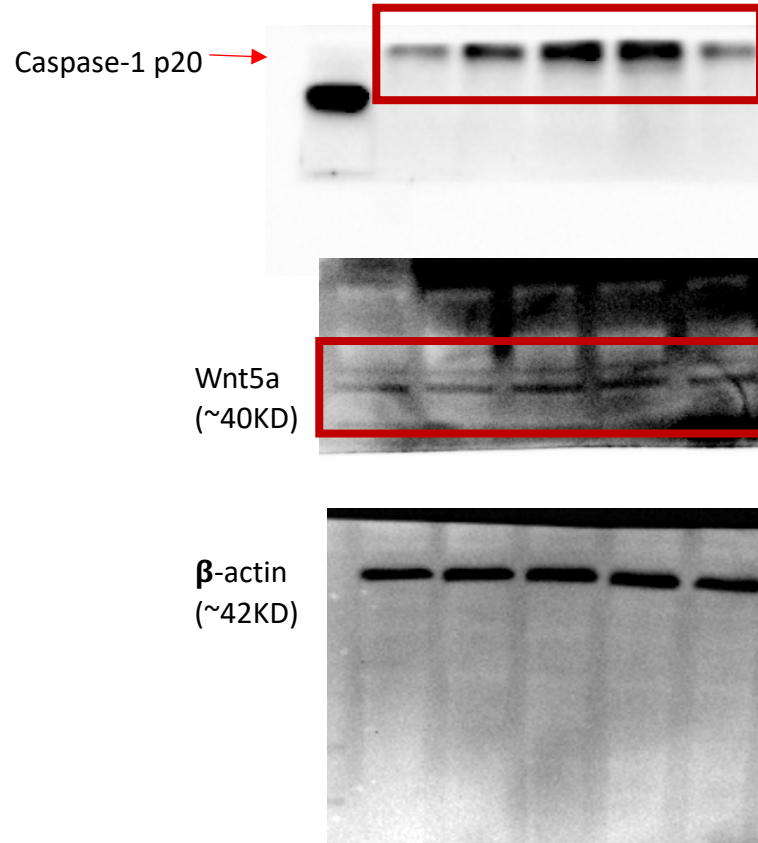

*Bottom*

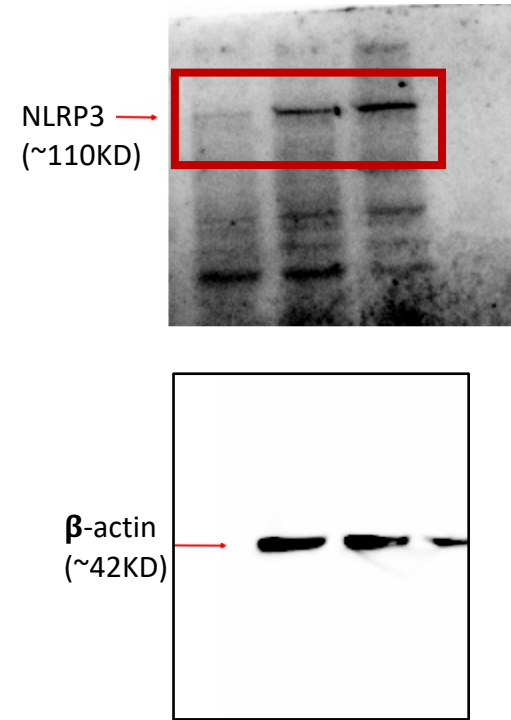

**Figure S11B**

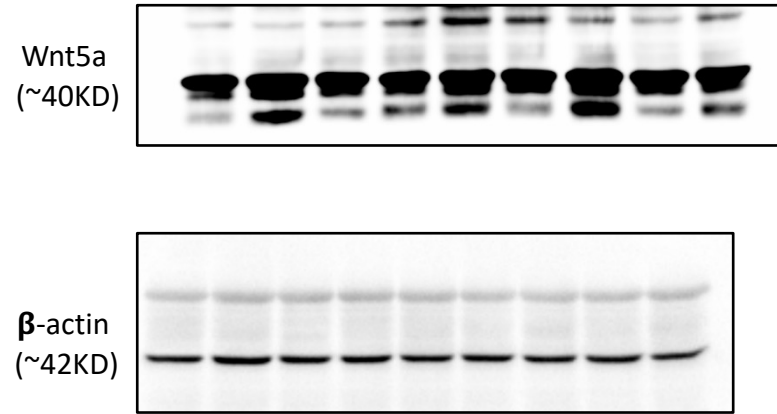

**Figure S13**

*Lysate*

NLRP3  
110KD

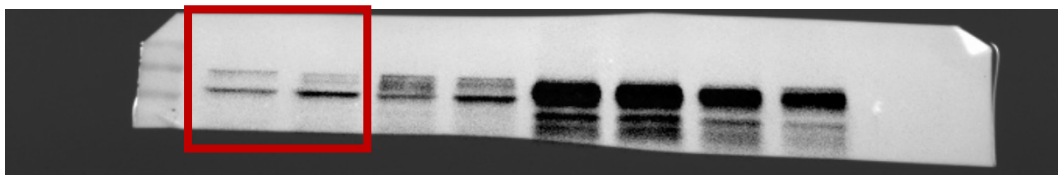

Wnt5a  
(~40KD)

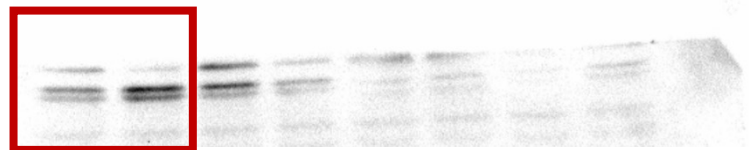

$\beta$ -actin  
(~42KD)

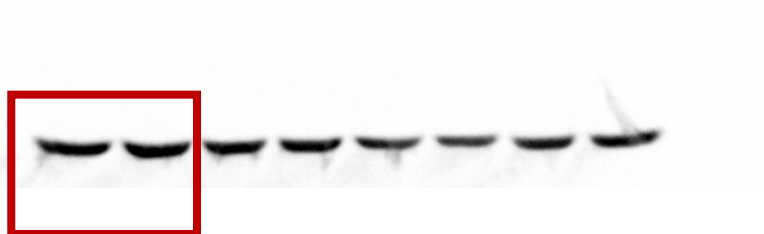

*Supernatant*

Hsp70  
(~70KD)

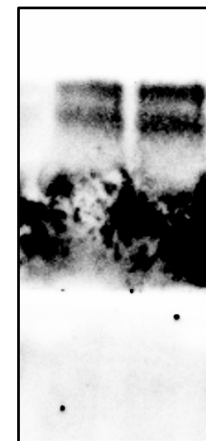

**Figure S15B**

*Top*

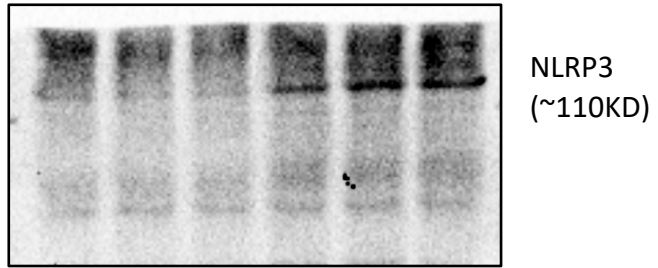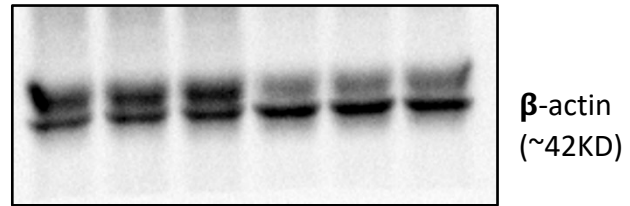

*Bottom – CD8<sup>+</sup> T cell ablation*

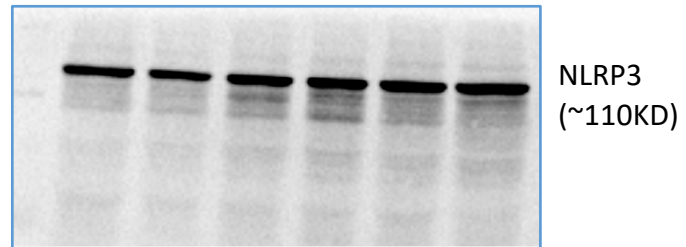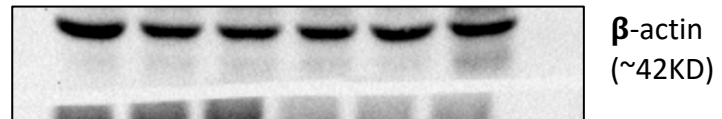

**Figure S15C**

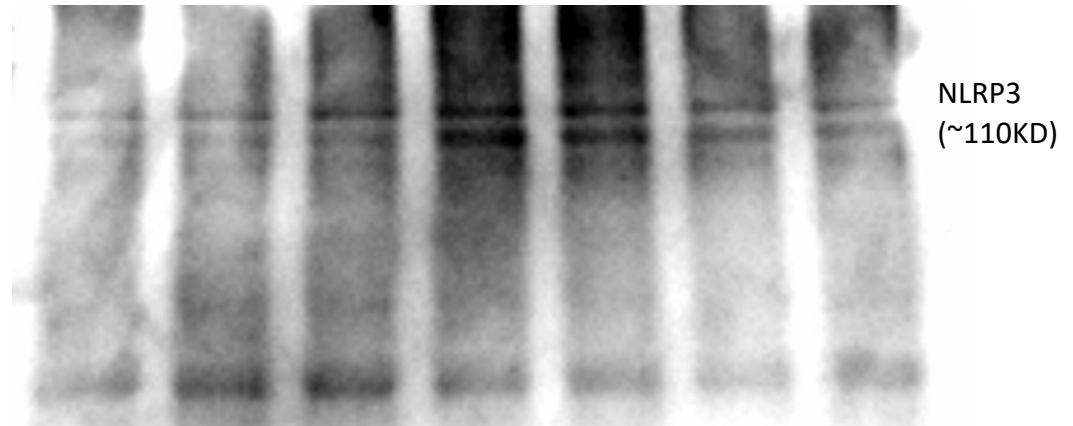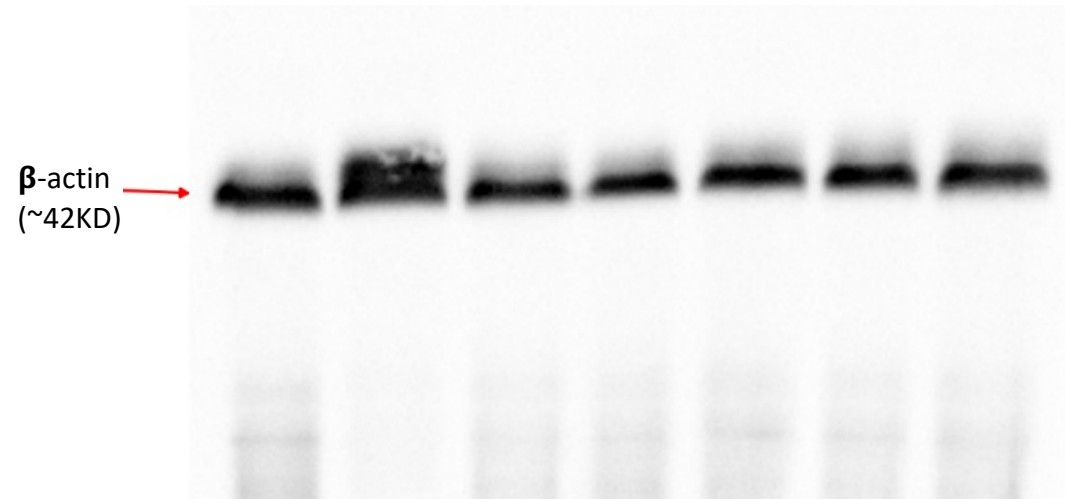

Supplement: NIHMS1905126-supplement-Data_File_S2.pdf [file NIHMS1905126-supplement-Data_File_S2.pdf]
